# Supplementary material for: Indirect effects of the covid-19 pandemic on childhood infection in England: population based observational study
Source: PubMed Central journal article supplement (PMC8753487; doi:10.1136/bmj-2021-067519), 2022-01-12
Supplement: kads067519.ww.pdf [file kads067519.ww.pdf]

**Supplementary Table 1: Estimated population size of children aged 0-14 in England 2017-2020  
(estimates for 2021 were not yet available at the time of publication)**

| <b>Year</b> | <b>Aged &lt;1</b> | <b>Aged 1-4</b> | <b>Aged 5-9</b> | <b>Aged 10-14</b> | <b>Total</b> |
|-------------|-------------------|-----------------|-----------------|-------------------|--------------|
| <b>2017</b> | 653,467           | 2,731,458       | 3,497,402       | 3,166,038         | 10,048,365   |
| <b>2018</b> | 637,834           | 2,708,893       | 3,523,866       | 3,274,119         | 10,144,712   |
| <b>2019</b> | 618,858           | 2,680,779       | 3,538,206       | 3,354,246         | 10,192,089   |
| <b>2020</b> | 601,913           | 2,637,534       | 3,539,458       | 3,435,579         | 10,214,484   |

Source: Office for National Statistics

<https://www.ons.gov.uk/file?uri=/peoplepopulationandcommunity/populationandmigration/populationestimates/datasets/populationestimatesforukenglandandwalesscotlandandnorthernireland/mid2001tomid2020detailedtimeseries/regionalpoestimatesenglandandwales19712020.xlsx>

<https://www.ons.gov.uk/file?uri=%2Fpeoplepopulationandcommunity%2Fpopulationandmigration%2Fpopulationestimates%2Fdatasets%2Fpopulationestimatesforukenglandandwalesscotlandandnorthernireland%2Fmid2020/ukpoestimatesmid2020on2021geography.xls>

**Supplementary table 2a: Demographic characteristics of individuals admitted with each respiratory infection in 2017-20 and in 2020-21**

|                               | Bronchiolitis  |                | Influenza      |                | Croup          |                | Pneumonia      |                | Viral wheeze   |                | Upper RTI      |                | Otitis media   |                | Tonsillitis    |                |
|-------------------------------|----------------|----------------|----------------|----------------|----------------|----------------|----------------|----------------|----------------|----------------|----------------|----------------|----------------|----------------|----------------|----------------|
|                               | 2017-20        | 2020-21        | 2017-20        | 2020-21        | 2017-20        | 2020-21        | 2017-20        | 2020-21        | 2017-20        | 2020-21        | 2017-20        | 2020-21        | 2017-20        | 2020-21        | 2017-20        | 2020-21        |
|                               | N (% of total) | N (% of total) | N (% of total) | N (% of total) | N (% of total) | N (% of total) | N (% of total) | N (% of total) | N (% of total) | N (% of total) | N (% of total) | N (% of total) | N (% of total) | N (% of total) | N (% of total) | N (% of total) |
| <b>Total number:</b>          | 51,655         | 9,423          | 5,379          | 304            | 15,500         | 3,352          | 16,403         | 6,540          | 77,488         | 34,367         | 58,238         | 19,677         | 33,103         | 8,649          | 54,604         | 18,398         |
| <b>Sex</b>                    |                |                |                |                |                |                |                |                |                |                |                |                |                |                |                |                |
| Male                          | 31415 (60.8)   | 6270 (66.5)    | 2955 (54.9)    | 165 (54.3)     | 10645 (68.7)   | 2500 (74.6)    | 8885 (54.2)    | 3720 (56.9)    | 50125 (64.7)   | 23020 (67)     | 32240 (55.4)   | 11045 (56.1)   | 19110 (57.7)   | 5090 (58.9)    | 29060 (53.2)   | 9920 (53.9)    |
| Female                        | 20240 (39.2)   | 3155 (33.5)    | 2425 (45.1)    | 140 (46.1)     | 4855 (31.3)    | 850 (25.4)     | 7520 (45.8)    | 2820 (43.1)    | 27365 (35.3)   | 11350 (33)     | 26000 (44.6)   | 8635 (43.9)    | 13995 (42.3)   | 3560 (41.2)    | 25545 (46.8)   | 8475 (46.1)    |
| <b>Age group</b>              |                |                |                |                |                |                |                |                |                |                |                |                |                |                |                |                |
| <1                            | 46125 (89.3)   | 7780 (82.6)    | 1070 (19.9)    | 55 (18.1)      | 3805 (24.5)    | 845 (25.2)     | 4300 (26.2)    | 2530 (38.7)    | 6740 (8.7)     | 1730 (5)       | 20090 (34.5)   | 7460 (37.9)    | 2060 (6.2)     | 810 (9.4)      | 5410 (9.9)     | 2100 (11.4)    |
| 1-4                           | 5425 (10.5)    | 1610 (17.1)    | 2575 (47.9)    | 150 (49.3)     | 10160 (65.5)   | 2055 (61.3)    | 7895 (48.1)    | 2055 (31.4)    | 61795 (79.7)   | 26835 (78.1)   | 30510 (52.4)   | 9900 (50.3)    | 16495 (49.8)   | 4105 (47.5)    | 29775 (54.5)   | 10765 (58.5)   |
| 5-9                           | 80 (0.2)       | 20 (0.2)       | 1030 (19.1)    | 60 (19.7)      | 1335 (8.6)     | 390 (11.6)     | 2795 (17)      | 1125 (17.2)    | 7785 (10)      | 5060 (14.7)    | 5615 (9.6)     | 1600 (8.1)     | 11685 (35.3)   | 2715 (31.4)    | 13500 (24.7)   | 3795 (20.6)    |
| 10-14                         | 30 (0.1)       | 15 (0.2)       | 705 (13.1)     | 45 (14.8)      | 200 (1.3)      | 60 (1.8)       | 1415 (8.6)     | 835 (12.8)     | 1170 (1.5)     | 740 (2.2)      | 2020 (3.5)     | 715 (3.6)      | 2865 (8.7)     | 1025 (11.9)    | 5920 (10.8)    | 1740 (9.5)     |
| <b>Region of residence</b>    |                |                |                |                |                |                |                |                |                |                |                |                |                |                |                |                |
| North East                    | 2865 (5.5)     | 400 (4.2)      | 220 (4.1)      | 5 (1.6)        | 955 (6.2)      | 175 (5.2)      | 625 (3.8)      | 185 (2.8)      | 3720 (4.8)     | 1655 (4.8)     | 3750 (6.4)     | 1055 (5.4)     | 1950 (5.9)     | 510 (5.9)      | 2870 (5.3)     | 930 (5.1)      |
| North West                    | 9765 (18.9)    | 1790 (19)      | 1325 (24.6)    | 65 (21.4)      | 3065 (19.8)    | 660 (19.7)     | 1700 (10.4)    | 675 (10.3)     | 13050 (16.8)   | 5755 (16.7)    | 12875 (22.1)   | 4400 (22.4)    | 5645 (17.1)    | 1540 (17.8)    | 11440 (21)     | 3715 (20.2)    |
| Yorkshire and Humber          | 5095 (9.9)     | 960 (10.2)     | 480 (8.9)      | 30 (9.9)       | 1425 (9.2)     | 285 (8.5)      | 1725 (10.5)    | 685 (10.5)     | 6315 (8.1)     | 2890 (8.4)     | 5230 (9)       | 1730 (8.8)     | 3625 (11)      | 860 (9.9)      | 5850 (10.7)    | 1820 (9.9)     |
| East Midlands                 | 4030 (7.8)     | 690 (7.3)      | 365 (6.8)      | 20 (6.6)       | 1200 (7.7)     | 210 (6.3)      | 1215 (7.4)     | 440 (6.7)      | 6410 (8.3)     | 2640 (7.7)     | 4020 (6.9)     | 1195 (6.1)     | 2525 (7.6)     | 555 (6.4)      | 3995 (7.3)     | 1170 (6.4)     |
| West Midlands                 | 5735 (11.1)    | 985 (10.5)     | 500 (9.3)      | 25 (8.2)       | 1825 (11.8)    | 330 (9.8)      | 1580 (9.6)     | 670 (10.2)     | 8680 (11.2)    | 3855 (11.2)    | 7205 (12.4)    | 2020 (10.3)    | 3390 (10.2)    | 870 (10.1)     | 6300 (11.5)    | 1880 (10.2)    |
| East of England               | 5480 (10.6)    | 990 (10.5)     | 425 (7.9)      | 25 (8.2)       | 1400 (9)       | 390 (11.6)     | 1540 (9.4)     | 585 (8.9)      | 6695 (8.6)     | 3320 (9.7)     | 5485 (9.4)     | 2505 (12.7)    | 4070 (12.3)    | 1035 (12)      | 6105 (11.2)    | 2515 (13.7)    |
| London                        | 6210 (12)      | 1175 (12.5)    | 895 (16.6)     | 70 (23)        | 1755 (11.3)    | 350 (10.4)     | 3475 (21.2)    | 1410 (21.6)    | 12765 (16.5)   | 5215 (15.2)    | 5990 (10.3)    | 1555 (7.9)     | 3675 (11.1)    | 905 (10.5)     | 6000 (11)      | 1720 (9.3)     |
| South East                    | 7560 (14.6)    | 1480 (15.7)    | 605 (11.2)     | 40 (13.2)      | 2365 (15.3)    | 485 (14.5)     | 2740 (16.7)    | 1225 (18.7)    | 12365 (16)     | 5440 (15.8)    | 7425 (12.7)    | 2510 (12.8)    | 5425 (16.4)    | 1470 (17)      | 8005 (14.7)    | 2885 (15.7)    |
| South West                    | 4915 (9.5)     | 955 (10.1)     | 560 (10.4)     | 25 (8.2)       | 1510 (9.7)     | 465 (13.9)     | 1800 (11)      | 660 (10.1)     | 7490 (9.7)     | 3605 (10.5)    | 6265 (10.8)    | 2705 (13.7)    | 2795 (8.4)     | 905 (10.5)     | 4045 (7.4)     | 1765 (9.6)     |
| <b>Deprivation quintile</b>   |                |                |                |                |                |                |                |                |                |                |                |                |                |                |                |                |
| 1 (Most deprived)             | 15890 (30.8)   | 2815 (29.9)    | 1785 (33.2)    | 100 (32.9)     | 3950 (25.5)    | 815 (24.3)     | 4385 (26.7)    | 1850 (28.3)    | 22780 (29.4)   | 10265 (29.9)   | 17295 (29.7)   | 5405 (27.5)    | 8320 (25.1)    | 2125 (24.6)    | 15930 (29.2)   | 4695 (25.5)    |
| 2                             | 11275 (21.8)   | 2045 (21.7)    | 1180 (21.9)    | 60 (19.7)      | 3180 (20.5)    | 660 (19.7)     | 3670 (22.4)    | 1460 (22.3)    | 16980 (21.9)   | 7305 (21.3)    | 12775 (21.9)   | 4035 (20.5)    | 6865 (20.7)    | 1840 (21.3)    | 11855 (21.7)   | 3990 (21.7)    |
| 3                             | 9200 (17.8)    | 1680 (17.8)    | 905 (16.8)     | 50 (16.4)      | 2915 (18.8)    | 660 (19.7)     | 3105 (18.9)    | 1125 (17.2)    | 13935 (18)     | 6390 (18.6)    | 10565 (18.1)   | 3750 (19.1)    | 6195 (18.7)    | 1580 (18.3)    | 10005 (18.3)   | 3465 (18.8)    |
| 4                             | 8065 (15.6)    | 1530 (16.2)    | 785 (14.6)     | 45 (14.8)      | 2800 (18.1)    | 640 (19.1)     | 2625 (16)      | 1115 (17)      | 12110 (15.6)   | 5205 (15.1)    | 9350 (16.1)    | 3345 (17)      | 5905 (17.8)    | 1655 (19.1)    | 8865 (16.2)    | 3195 (17.4)    |
| 5 (Least deprived)            | 7230 (14)      | 1355 (14.4)    | 725 (13.5)     | 50 (16.4)      | 2655 (17.1)    | 580 (17.3)     | 2610 (15.9)    | 990 (15.1)     | 11685 (15.1)   | 5205 (15.1)    | 8255 (14.2)    | 3145 (16)      | 5820 (17.6)    | 1445 (16.7)    | 7950 (14.6)    | 3055 (16.6)    |
| <b>Ethnic category</b>        |                |                |                |                |                |                |                |                |                |                |                |                |                |                |                |                |
| White                         | 39525 (76.5)   | 7100 (75.3)    | 3570 (66.4)    | 185 (60.9)     | 12385 (79.9)   | 2715 (81)      | 11230 (68.5)   | 4345 (66.4)    | 52385 (67.6)   | 22180 (64.5)   | 43005 (73.8)   | 14775 (75.1)   | 26620 (80.4)   | 6895 (79.7)    | 41480 (76)     | 14345 (78)     |
| Mixed                         | 2475 (4.8)     | 425 (4.5)      | 250 (4.6)      | 20 (6.6)       | 645 (4.2)      | 155 (4.6)      | 775 (4.7)      | 350 (5.4)      | 4525 (5.8)     | 2205 (6.4)     | 2700 (4.6)     | 1005 (5.1)     | 1170 (3.5)     | 330 (3.8)      | 2330 (4.3)     | 890 (4.8)      |
| Asian                         | 5240 (10.1)    | 970 (10.3)     | 895 (16.6)     | 55 (18.1)      | 1265 (8.2)     | 225 (6.7)      | 2275 (13.9)    | 945 (14.4)     | 12250 (15.8)   | 5805 (16.9)    | 7070 (12.1)    | 2015 (10.2)    | 2950 (8.9)     | 795 (9.2)      | 5880 (10.8)    | 1490 (8.1)     |
| Black                         | 1760 (3.4)     | 345 (3.7)      | 325 (6)        | 30 (9.9)       | 385 (2.5)      | 65 (1.9)       | 1065 (6.5)     | 450 (6.9)      | 3885 (5)       | 1830 (5.3)     | 2125 (3.6)     | 620 (3.2)      | 810 (2.4)      | 200 (2.3)      | 1730 (3.2)     | 520 (2.8)      |
| Other                         | 1200 (2.3)     | 285 (3)        | 210 (3.9)      | 15 (4.9)       | 410 (2.6)      | 85 (2.5)       | 655 (4)        | 255 (3.9)      | 2785 (3.6)     | 1340 (3.9)     | 1665 (2.9)     | 545 (2.8)      | 795 (2.4)      | 215 (2.5)      | 1690 (3.1)     | 560 (3)        |
| <b>Comorbidity</b>            |                |                |                |                |                |                |                |                |                |                |                |                |                |                |                |                |
| No known comorbidity          | 47055 (91.1)   | 8255 (87.6)    | 4335 (80.6)    | 240 (78.9)     | 13915 (89.8)   | 2890 (86.2)    | 12545 (76.5)   | 4625 (70.7)    | 65225 (84.2)   | 29120 (84.7)   | 51435 (88.3)   | 17360 (88.2)   | 29075 (87.8)   | 7460 (86.3)    | 49435 (90.5)   | 16885 (91.8)   |
| Asthma                        | 255 (0.5)      | 80 (0.8)       | 430 (8)        | 25 (8.2)       | 740 (4.8)      | 220 (6.6)      | 1640 (10)      | 625 (9.6)      | 9395 (12.1)    | 4185 (12.2)    | 2825 (4.9)     | 885 (4.5)      | 2520 (7.6)     | 635 (7.3)      | 3580 (6.6)     | 950 (5.2)      |
| Bronchopulmonary dysplasia    | 1205 (2.3)     | 340 (3.6)      | 110 (2)        | 5 (1.6)        | 165 (1.1)      | 50 (1.5)       | 160 (1.1)      | 260 (4)        | 955 (1.2)      | 295 (0.9)      | 745 (1.3)      | 250 (1.3)      | 240 (0.7)      | 80 (0.9)       | 280 (0.5)      | 70 (0.4)       |
| Extreme prematurity <28 weeks | 1440 (2.8)     | 365 (3.9)      | 95 (1.8)       | 5 (1.6)        | 200 (1.3)      | 50 (1.5)       | 485 (3)        | 270 (4.1)      | 995 (1.3)      | 325 (0.9)      | 750 (1.3)      | 250 (1.3)      | 190 (0.6)      | 75 (0.9)       | 285 (0.5)      | 95 (0.5)       |
| Cystic fibrosis               | 55 (0.1)       | 15 (0.2)       | 35 (0.7)       | 5 (1.6)        | 20 (0.1)       | 5 (0.1)        | 80 (0.5)       | 35 (0.5)       | 70 (0.1)       | 35 (0.1)       | 150 (0.3)      | 45 (0.2)       | 25 (0.1)       | 20 (0.2)       | 70 (0.1)       | 25 (0.1)       |
| Congenital cardiac disease    | 3090 (6)       | 790 (8.4)      | 355 (6.6)      | 30 (9.9)       | 645 (4.2)      | 190 (5.7)      | 1595 (9.7)     | 865 (13.2)     | 2090 (2.7)     | 810 (2.4)      | 2730 (4.7)     | 1050 (5.3)     | 1170 (3.5)     | 430 (5)        | 1165 (2.1)     | 425 (2.3)      |
| Bronchiectasis                | 40 (0.1)       | 15 (0.2)       | 35 (0.7)       | 5 (1.6)        | 10 (0.1)       | 0 (0)          | 120 (0.7)      | 80 (1.2)       | 145 (0.2)      | 55 (0.2)       | 80 (0.1)       | 40 (0.2)       | 50 (0.2)       | 25 (0.3)       | 30 (0.1)       | 15 (0.1)       |
| Immunodeficiencies            | 25 (0)         | 15 (0.2)       | 25 (0.5)       | 0 (0)          | 25 (0.2)       | 5 (0.1)        | 70 (0.4)       | 60 (0.9)       | 95 (0.1)       | 55 (0.2)       | 115 (0.2)      | 40 (0.2)       | 80 (0.2)       | 30 (0.3)       | 80 (0.1)       | 35 (0.2)       |
| Acute lymphoblastic leukaemia | 15 (0)         | 0 (0)          | 170 (3.2)      | 10 (3.3)       | 40 (0.3)       | 10 (0.3)       | 170 (1)        | 195 (3)        | 45 (0.1)       | 25 (0.1)       | 600 (1)        | 195 (1)        | 195 (0.6)      | 80 (0.9)       | 120 (0.2)      | 45 (0.2)       |
| Acute myeloid leukaemia       | 5 (0)          | 0 (0)          | 15 (0.3)       | 0 (0)          | 5 (0)          | 0 (0)          | 55 (0.3)       | 30 (0.5)       | 10 (0)         | 0 (0)          | 50 (0.1)       | 20 (0.1)       | 20 (0.1)       | 10 (0.1)       | 15 (0)         | 5 (0)          |

Subgroup numbers are rounded to the nearest 5, in accordance with NHS Digital reporting guidelines, to preclude deductive identification of individual patients where numbers are small

**Supplementary table 2b: Demographic characteristics of individuals admitted with each severe invasive infection in 2017-20 and in 2020-21**

|                               | Sepsis         |                | Meningitis     |                | Septic arthritis |                | Osteomyelitis  |                | Pyelonephritis |                | Cellulitis     |                |
|-------------------------------|----------------|----------------|----------------|----------------|------------------|----------------|----------------|----------------|----------------|----------------|----------------|----------------|
|                               | 2017-20        | 2020-21        | 2017-20        | 2020-21        | 2017-20          | 2020-21        | 2017-20        | 2020-21        | 2017-20        | 2020-21        | 2017-20        | 2020-21        |
|                               | N (% of total) | N (% of total) | N (% of total) | N (% of total) | N (% of total)   | N (% of total) | N (% of total) | N (% of total) | N (% of total) | N (% of total) | N (% of total) | N (% of total) |
| <b>Total number:</b>          | 11,717         | 7,798          | 3,917          | 1,964          | 849              | 554            | 2,017          | 1,483          | 317            | 331            | 7,574          | 4,290          |
| <b>Sex</b>                    |                |                |                |                |                  |                |                |                |                |                |                |                |
| Male                          | 6485 (55.3)    | 4470 (57.3)    | 2260 (57.7)    | 1040 (53)      | 475 (55.9)       | 310 (56)       | 1075 (53.3)    | 760 (51.2)     | 65 (20.5)      | 80 (24.2)      | 4110 (54.3)    | 2310 (53.8)    |
| Female                        | 5230 (44.6)    | 3330 (42.7)    | 1655 (42.3)    | 920 (46.8)     | 370 (43.6)       | 245 (44.2)     | 945 (46.9)     | 725 (48.9)     | 250 (78.9)     | 250 (75.5)     | 3465 (45.7)    | 1980 (46.2)    |
| <b>Age group</b>              |                |                |                |                |                  |                |                |                |                |                |                |                |
| <1                            | 6000 (51.2)    | 4070 (52.2)    | 2435 (62.2)    | 1150 (58.6)    | 130 (15.3)       | 95 (17.1)      | 130 (6.4)      | 65 (4.4)       | 40 (12.6)      | 60 (18.1)      | 1165 (15.4)    | 775 (18.1)     |
| 1-4                           | 3285 (28)      | 1990 (25.5)    | 565 (14.4)     | 270 (13.7)     | 355 (41.8)       | 195 (35.2)     | 430 (21.3)     | 275 (18.5)     | 65 (20.5)      | 80 (24.2)      | 2775 (36.6)    | 1370 (31.9)    |
| 5-9                           | 1460 (12.5)    | 945 (12.1)     | 505 (12.9)     | 275 (14)       | 180 (21.2)       | 120 (21.7)     | 545 (27)       | 385 (26)       | 105 (33.1)     | 105 (31.7)     | 1935 (25.5)    | 1120 (26.1)    |
| 10-14                         | 975 (8.3)      | 795 (10.2)     | 415 (10.6)     | 275 (14)       | 185 (21.8)       | 140 (25.3)     | 915 (45.4)     | 760 (51.2)     | 105 (33.1)     | 85 (25.7)      | 1700 (22.4)    | 1025 (23.9)    |
| <b>Region of residence</b>    |                |                |                |                |                  |                |                |                |                |                |                |                |
| North East                    | 315 (2.7)      | 195 (2.5)      | 175 (4.5)      | 75 (3.8)       | 30 (3.5)         | 25 (4.5)       | 75 (3.7)       | 70 (4.7)       | 10 (3.2)       | 10 (3)         | 390 (5.1)      | 220 (5.1)      |
| North West                    | 1765 (15.1)    | 1225 (15.7)    | 495 (12.6)     | 245 (12.5)     | 105 (12.4)       | 80 (14.4)      | 280 (13.9)     | 190 (12.8)     | 35 (11)        | 55 (16.6)      | 1110 (14.7)    | 705 (16.4)     |
| Yorkshire and Humber          | 1295 (11.1)    | 880 (11.3)     | 475 (12.1)     | 235 (12)       | 85 (10)          | 55 (9.9)       | 160 (7.9)      | 105 (7.1)      | 45 (14.2)      | 30 (9.1)       | 755 (10)       | 425 (9.9)      |
| East Midlands                 | 995 (8.5)      | 605 (7.8)      | 330 (8.4)      | 205 (10.4)     | 55 (6.5)         | 30 (5.4)       | 85 (4.2)       | 90 (6.1)       | 15 (4.7)       | 15 (4.5)       | 425 (5.6)      | 205 (4.8)      |
| West Midlands                 | 1220 (10.4)    | 845 (10.8)     | 450 (11.5)     | 210 (10.7)     | 75 (8.8)         | 60 (10.8)      | 155 (7.7)      | 100 (6.7)      | 20 (6.3)       | 25 (7.6)       | 760 (10)       | 425 (9.9)      |
| East of England               | 1235 (10.5)    | 800 (10.3)     | 390 (10)       | 180 (9.2)      | 75 (8.8)         | 45 (8.1)       | 185 (9.2)      | 110 (7.4)      | 35 (11)        | 35 (10.6)      | 770 (10.2)     | 445 (10.4)     |
| London                        | 2265 (19.3)    | 1520 (19.5)    | 640 (16.3)     | 375 (19.1)     | 175 (20.6)       | 100 (18.1)     | 555 (27.5)     | 300 (20.2)     | 80 (25.2)      | 85 (25.7)      | 1425 (18.8)    | 735 (17.1)     |
| South East                    | 1870 (16)      | 1240 (15.9)    | 635 (16.2)     | 285 (14.5)     | 170 (20)         | 100 (18.1)     | 335 (16.6)     | 280 (18.9)     | 55 (17.4)      | 60 (18.1)      | 1355 (17.9)    | 740 (17.2)     |
| South West                    | 755 (6.4)      | 485 (6.2)      | 335 (8.6)      | 160 (8.1)      | 80 (9.4)         | 60 (10.8)      | 190 (9.4)      | 235 (15.8)     | 20 (6.3)       | 15 (4.5)       | 585 (7.7)      | 395 (9.2)      |
| <b>Deprivation quintile</b>   |                |                |                |                |                  |                |                |                |                |                |                |                |
| 1 (Most deprived)             | 3325 (28.4)    | 2205 (28.3)    | 1045 (26.7)    | 590 (30)       | 200 (23.6)       | 120 (21.7)     | 565 (28)       | 390 (26.3)     | 90 (28.4)      | 105 (31.7)     | 2125 (28.1)    | 1215 (28.3)    |
| 2                             | 2715 (23.2)    | 1820 (23.3)    | 815 (20.8)     | 440 (22.4)     | 185 (21.8)       | 130 (23.5)     | 465 (23.1)     | 300 (20.2)     | 70 (22.1)      | 50 (15.1)      | 1615 (21.3)    | 860 (20)       |
| 3                             | 2110 (18)      | 1400 (18)      | 695 (17.7)     | 310 (15.8)     | 165 (19.4)       | 110 (19.9)     | 350 (17.4)     | 275 (18.5)     | 65 (20.5)      | 55 (16.6)      | 1345 (17.8)    | 770 (17.9)     |
| 4                             | 1785 (15.2)    | 1215 (15.6)    | 690 (17.6)     | 285 (14.5)     | 150 (17.7)       | 100 (18.1)     | 355 (17.6)     | 255 (17.2)     | 40 (12.6)      | 60 (18.1)      | 1235 (16.3)    | 725 (16.9)     |
| 5 (Least deprived)            | 1780 (15.2)    | 1155 (14.8)    | 675 (17.2)     | 340 (17.3)     | 150 (17.7)       | 95 (17.1)      | 280 (13.9)     | 260 (17.5)     | 55 (17.4)      | 65 (19.6)      | 1255 (16.6)    | 725 (16.9)     |
| <b>Ethnic category</b>        |                |                |                |                |                  |                |                |                |                |                |                |                |
| White                         | 8500 (72.5)    | 5590 (71.7)    | 2925 (74.7)    | 1375 (70)      | 620 (73)         | 400 (72.2)     | 1395 (69.2)    | 1080 (72.8)    | 230 (72.6)     | 245 (74)       | 5480 (72.4)    | 3185 (74.2)    |
| Mixed                         | 575 (4.9)      | 375 (4.8)      | 205 (5.2)      | 95 (4.8)       | 40 (4.7)         | 30 (5.4)       | 85 (4.2)       | 70 (4.7)       | 15 (4.7)       | 15 (4.5)       | 335 (4.4)      | 190 (4.4)      |
| Asian                         | 1460 (12.5)    | 975 (12.5)     | 390 (10)       | 245 (12.5)     | 85 (10)          | 75 (13.5)      | 215 (10.7)     | 130 (8.8)      | 40 (12.6)      | 40 (12.1)      | 870 (11.5)     | 435 (10.1)     |
| Black                         | 515 (4.4)      | 370 (4.7)      | 165 (4.2)      | 110 (5.6)      | 50 (5.9)         | 25 (4.5)       | 205 (10.2)     | 130 (8.8)      | 10 (3.2)       | 10 (3)         | 350 (4.6)      | 165 (3.8)      |
| Other                         | 430 (3.7)      | 295 (3.8)      | 135 (3.4)      | 100 (5.1)      | 40 (4.7)         | 15 (2.7)       | 95 (4.7)       | 50 (3.4)       | 20 (6.3)       | 10 (3)         | 335 (4.4)      | 180 (4.2)      |
| <b>Comorbidity</b>            |                |                |                |                |                  |                |                |                |                |                |                |                |
| No known comorbidity          | 9465 (80.8)    | 6145 (78.8)    | 3560 (90.9)    | 1665 (84.8)    | 770 (90.7)       | 505 (91.2)     | 1780 (88.2)    | 1310 (88.3)    | 285 (89.9)     | 305 (92.1)     | 6680 (88.2)    | 3695 (86.1)    |
| Asthma                        | 420 (3.6)      | 215 (2.8)      | 130 (3.3)      | 85 (4.3)       | 50 (5.9)         | 30 (5.4)       | 170 (8.4)      | 100 (6.7)      | 20 (6.3)       | 15 (4.5)       | 535 (7.1)      | 315 (7.3)      |
| Bronchopulmonary dysplasia    | 240 (2)        | 195 (2.5)      | 55 (1.4)       | 45 (2.3)       | 5 (0.6)          | 0 (0)          | 10 (0.5)       | 5 (0.3)        | 0 (0)          | 0 (0)          | 40 (0.5)       | 40 (0.9)       |
| Extreme prematurity <28 weeks | 245 (2.1)      | 210 (2.7)      | 75 (1.9)       | 80 (4.1)       | 0 (0)            | 0 (0)          | 10 (0.5)       | 5 (0.3)        | 0 (0)          | 5 (1.5)        | 45 (0.6)       | 40 (0.9)       |
| Cystic fibrosis               | 20 (0.2)       | 10 (0.1)       | 0 (0)          | 0 (0)          | 0 (0)            | 0 (0)          | 0 (0)          | 0 (0)          | 0 (0)          | 0 (0)          | 10 (0.1)       | 5 (0.1)        |
| Congenital cardiac disease    | 880 (7.5)      | 655 (8.4)      | 150 (3.8)      | 130 (6.6)      | 20 (2.4)         | 15 (2.7)       | 50 (2.5)       | 30 (2)         | 5 (1.6)        | 10 (3)         | 220 (2.9)      | 175 (4.1)      |
| Bronchiectasis                | 35 (0.3)       | 25 (0.3)       | 0 (0)          | 0 (0)          | 0 (0)            | 0 (0)          | 5 (0.2)        | 0 (0)          | 0 (0)          | 0 (0)          | 5 (0.1)        | 5 (0.1)        |
| Immunodeficiencies            | 65 (0.6)       | 50 (0.6)       | 10 (0.3)       | 5 (0.3)        | 0 (0)            | 5 (0.9)        | 10 (0.5)       | 0 (0)          | 0 (0)          | 0 (0)          | 15 (0.2)       | 10 (0.2)       |
| Acute lymphoblastic leukaemia | 760 (6.5)      | 605 (7.8)      | 10 (0.3)       | 15 (0.8)       | 5 (0.6)          | 5 (0.9)        | 15 (0.7)       | 35 (2.4)       | 0 (0)          | 0 (0)          | 110 (1.5)      | 90 (2.1)       |
| Acute myeloid leukaemia       | 125 (1.1)      | 90 (1.2)       | 5 (0.1)        | 0 (0)          | 0 (0)            | 0 (0)          | 5 (0.2)        | 5 (0.3)        | 0 (0)          | 0 (0)          | 10 (0.1)       | 15 (0.3)       |

Subgroup numbers are rounded to the nearest 5, in accordance with NHS Digital reporting guidelines, to preclude deductive identification of individual patients where numbers are small

**Supplementary table 2c: Demographic characteristics of individuals admitted with each vaccine preventable infection in 2017-20 and in 2020-21**

|                               | Neisseria meningitidis |                | Strep. Pneumoniae |                | Haemophilus influenza |                | Measles        |                | Mumps          |                |
|-------------------------------|------------------------|----------------|-------------------|----------------|-----------------------|----------------|----------------|----------------|----------------|----------------|
|                               | N (% of total)         | N (% of total) | N (% of total)    | N (% of total) | N (% of total)        | N (% of total) | N (% of total) | N (% of total) | N (% of total) | N (% of total) |
|                               | 2017-20                | 2020-21        | 2017-20           | 2020-21        | 2017-20               | 2020-21        | 2017-20        | 2020-21        | 2017-20        | 2020-21        |
| <b>Total number:</b>          | 618                    | 191            | 270               | 108            | 47                    | 22             | 149            | 15             | 103            | 48             |
| <b>Sex</b>                    |                        |                |                   |                |                       |                |                |                |                |                |
| Male                          | 355 (57.4)             | 105 (55)       | 155 (57.4)        | 50 (46.3)      | 25 (53.2)             | 15 (68.2)      | 80 (53.7)      | 5 (33.3)       | 60 (58.3)      | 35 (72.9)      |
| Female                        | 260 (42.1)             | 90 (47.1)      | 115 (42.6)        | 60 (55.6)      | 25 (53.2)             | 5 (22.7)       | 70 (47)        | 10 (66.7)      | 40 (38.8)      | 10 (20.8)      |
| <b>Age group</b>              |                        |                |                   |                |                       |                |                |                |                |                |
| <1                            | 170 (27.5)             | 70 (36.6)      | 95 (35.2)         | 50 (46.3)      | 20 (42.6)             | 5 (22.7)       | 45 (30.2)      | 0 (0)          | 5 (4.9)        | 5 (10.4)       |
| 1-4                           | 255 (41.3)             | 70 (36.6)      | 115 (42.6)        | 40 (37)        | 20 (42.6)             | 15 (68.2)      | 75 (50.3)      | 10 (66.7)      | 35 (34)        | 20 (41.7)      |
| 5-9                           | 130 (21)               | 30 (15.7)      | 40 (14.8)         | 10 (9.3)       | 10 (21.3)             | 0 (0)          | 15 (10.1)      | 5 (33.3)       | 35 (34)        | 15 (31.3)      |
| 10-14                         | 60 (9.7)               | 25 (13.1)      | 20 (7.4)          | 5 (4.6)        | 0 (0)                 | 0 (0)          | 15 (10.1)      | 0 (0)          | 25 (24.3)      | 10 (20.8)      |
| <b>Region of residence</b>    |                        |                |                   |                |                       |                |                |                |                |                |
| North East                    | 45 (7.3)               | 10 (5.2)       | 10 (3.7)          | 15 (13.9)      | 0 (0)                 | 0 (0)          | 5 (3.4)        | 0 (0)          | 10 (9.7)       | 0 (0)          |
| North West                    | 140 (22.7)             | 40 (20.9)      | 45 (16.7)         | 25 (23.1)      | 5 (10.6)              | 0 (0)          | 20 (13.4)      | 0 (0)          | 25 (24.3)      | 10 (20.8)      |
| Yorkshire and Humber          | 100 (16.2)             | 60 (31.4)      | 60 (22.2)         | 10 (9.3)       | 5 (10.6)              | 0 (0)          | 20 (13.4)      | 0 (0)          | 10 (9.7)       | 5 (10.4)       |
| East Midlands                 | 45 (7.3)               | 15 (7.9)       | 20 (7.4)          | 5 (4.6)        | 5 (10.6)              | 0 (0)          | 5 (3.4)        | 5 (33.3)       | 5 (4.9)        | 0 (0)          |
| West Midlands                 | 100 (16.2)             | 20 (10.5)      | 25 (9.3)          | 15 (13.9)      | 0 (0)                 | 5 (22.7)       | 20 (13.4)      | 0 (0)          | 10 (9.7)       | 5 (10.4)       |
| East of England               | 45 (7.3)               | 10 (5.2)       | 20 (7.4)          | 5 (4.6)        | 5 (10.6)              | 0 (0)          | 10 (6.7)       | 0 (0)          | 10 (9.7)       | 10 (20.8)      |
| London                        | 60 (9.7)               | 15 (7.9)       | 35 (13)           | 15 (13.9)      | 10 (21.3)             | 0 (0)          | 50 (33.6)      | 5 (33.3)       | 15 (14.6)      | 10 (20.8)      |
| South East                    | 60 (9.7)               | 15 (7.9)       | 40 (14.8)         | 15 (13.9)      | 10 (21.3)             | 0 (0)          | 15 (10.1)      | 0 (0)          | 10 (9.7)       | 5 (10.4)       |
| South West                    | 25 (4)                 | 10 (5.2)       | 20 (7.4)          | 5 (4.6)        | 5 (10.6)              | 5 (22.7)       | 10 (6.7)       | 0 (0)          | 5 (4.9)        | 0 (0)          |
| <b>Deprivation quintile</b>   |                        |                |                   |                |                       |                |                |                |                |                |
| 1 (Most deprived)             | 225 (36.4)             | 65 (34)        | 70 (25.9)         | 35 (32.4)      | 15 (31.9)             | 5 (22.7)       | 60 (40.3)      | 5 (33.3)       | 35 (34)        | 15 (31.3)      |
| 2                             | 130 (21)               | 45 (23.6)      | 65 (24.1)         | 25 (23.1)      | 10 (21.3)             | 0 (0)          | 35 (23.5)      | 5 (33.3)       | 20 (19.4)      | 5 (10.4)       |
| 3                             | 95 (15.4)              | 20 (10.5)      | 45 (16.7)         | 25 (23.1)      | 10 (21.3)             | 5 (22.7)       | 20 (13.4)      | 0 (0)          | 15 (14.6)      | 5 (10.4)       |
| 4                             | 90 (14.6)              | 35 (18.3)      | 55 (20.4)         | 20 (18.5)      | 5 (10.6)              | 5 (22.7)       | 15 (10.1)      | 0 (0)          | 15 (14.6)      | 15 (31.3)      |
| 5 (Least deprived)            | 75 (12.1)              | 25 (13.1)      | 40 (14.8)         | 5 (4.6)        | 10 (21.3)             | 10 (45.5)      | 10 (6.7)       | 0 (0)          | 15 (14.6)      | 5 (10.4)       |
| <b>Ethnic category</b>        |                        |                |                   |                |                       |                |                |                |                |                |
| White                         | 515 (83.3)             | 175 (91.6)     | 200 (74.1)        | 85 (78.7)      | 35 (74.5)             | 10 (45.5)      | 100 (67.1)     | 10 (66.7)      | 75 (72.8)      | 30 (62.5)      |
| Mixed                         | 20 (3.2)               | 5 (2.6)        | 10 (3.7)          | 5 (4.6)        | 0 (0)                 | 0 (0)          | 10 (6.7)       | 5 (33.3)       | 5 (4.9)        | 0 (0)          |
| Asian                         | 35 (5.7)               | 0 (0)          | 35 (13)           | 10 (9.3)       | 5 (10.6)              | 5 (22.7)       | 15 (10.1)      | 5 (33.3)       | 10 (9.7)       | 5 (10.4)       |
| Black                         | 15 (2.4)               | 5 (2.6)        | 10 (3.7)          | 5 (4.6)        | 5 (10.6)              | 0 (0)          | 10 (6.7)       | 0 (0)          | 5 (4.9)        | 5 (10.4)       |
| Other                         | 20 (3.2)               | 5 (2.6)        | 5 (1.9)           | 0 (0)          | 0 (0)                 | 0 (0)          | 15 (10.1)      | 0 (0)          | 5 (4.9)        | 5 (10.4)       |
| <b>Comorbidity</b>            |                        |                |                   |                |                       |                |                |                |                |                |
| No known comorbidity          | 565 (91.4)             | 180 (94.2)     | 0 (0)             | 0 (0)          | 0 (0)                 | 0 (0)          | 140 (94)       | 10 (66.7)      | 90 (87.4)      | 40 (83.3)      |
| Asthma                        | 30 (4.9)               | 0 (0)          | 0 (0)             | 0 (0)          | 0 (0)                 | 0 (0)          | 5 (3.4)        | 0 (0)          | 10 (9.7)       | 0 (0)          |
| Bronchopulmonary dysplasia    | 5 (0.8)                | 0 (0)          | 0 (0)             | 0 (0)          | 0 (0)                 | 0 (0)          | 0 (0)          | 0 (0)          | 0 (0)          | 0 (0)          |
| Extreme prematurity <28 weeks | 5 (0.8)                | 0 (0)          | 0 (0)             | 0 (0)          | 0 (0)                 | 0 (0)          | 0 (0)          | 0 (0)          | 0 (0)          | 0 (0)          |
| Cystic fibrosis               | 0 (0)                  | 0 (0)          | 0 (0)             | 0 (0)          | 0 (0)                 | 0 (0)          | 0 (0)          | 0 (0)          | 0 (0)          | 0 (0)          |
| Congenital cardiac disease    | 20 (3.2)               | 5 (2.6)        | 0 (0)             | 0 (0)          | 0 (0)                 | 0 (0)          | 5 (3.4)        | 0 (0)          | 0 (0)          | 0 (0)          |
| Bronchiectasis                | 0 (0)                  | 0 (0)          | 0 (0)             | 0 (0)          | 0 (0)                 | 0 (0)          | 0 (0)          | 0 (0)          | 0 (0)          | 0 (0)          |
| Immunodeficiencies            | 0 (0)                  | 0 (0)          | 0 (0)             | 0 (0)          | 0 (0)                 | 0 (0)          | 0 (0)          | 5 (33.3)       | 0 (0)          | 0 (0)          |
| Acute lymphoblastic leukaemia | 0 (0)                  | 0 (0)          | 0 (0)             | 0 (0)          | 0 (0)                 | 0 (0)          | 0 (0)          | 0 (0)          | 0 (0)          | 0 (0)          |
| Acute myeloid leukaemia       | 0 (0)                  | 0 (0)          | 0 (0)             | 0 (0)          | 0 (0)                 | 0 (0)          | 0 (0)          | 0 (0)          | 0 (0)          | 0 (0)          |

Subgroup numbers are rounded to the nearest 5, in accordance with NHS Digital reporting guidelines, to preclude deductive identification of individual patients where numbers are small

### Supplementary Figure 1:

Percentage change in the number of individuals admitted, from Mar 2017 - Feb 2020 (mean over 3 years) to Mar 2020 - Feb 2021, by hospital trust

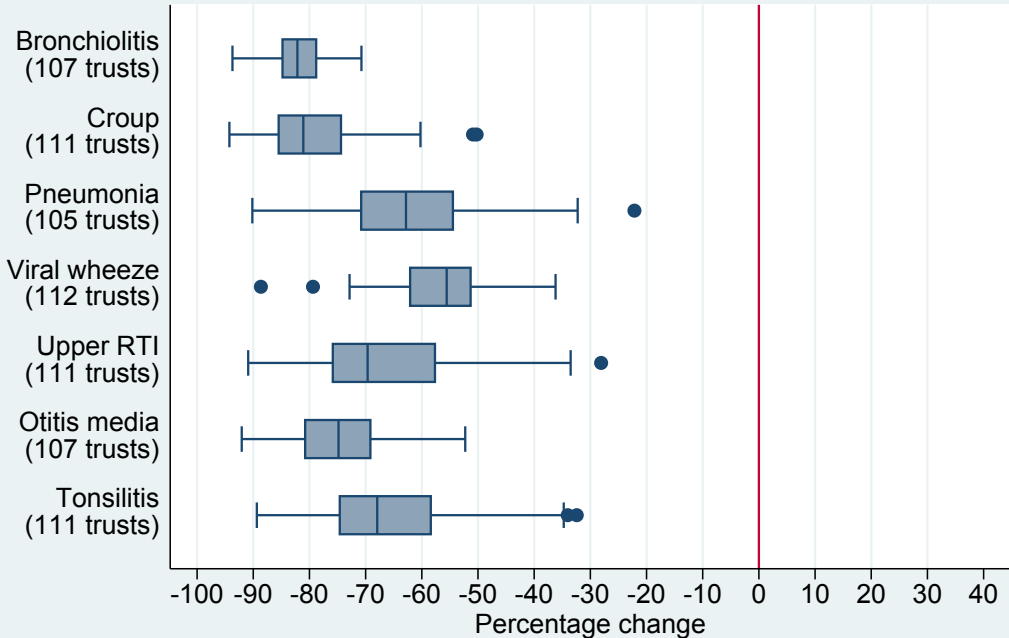

## Supplementary Figure 2: Respiratory infections

Percentage change in the number of individuals admitted, from Mar 2017 - Feb 2020 (mean over 3 years) to Mar 2020 - Feb 2021

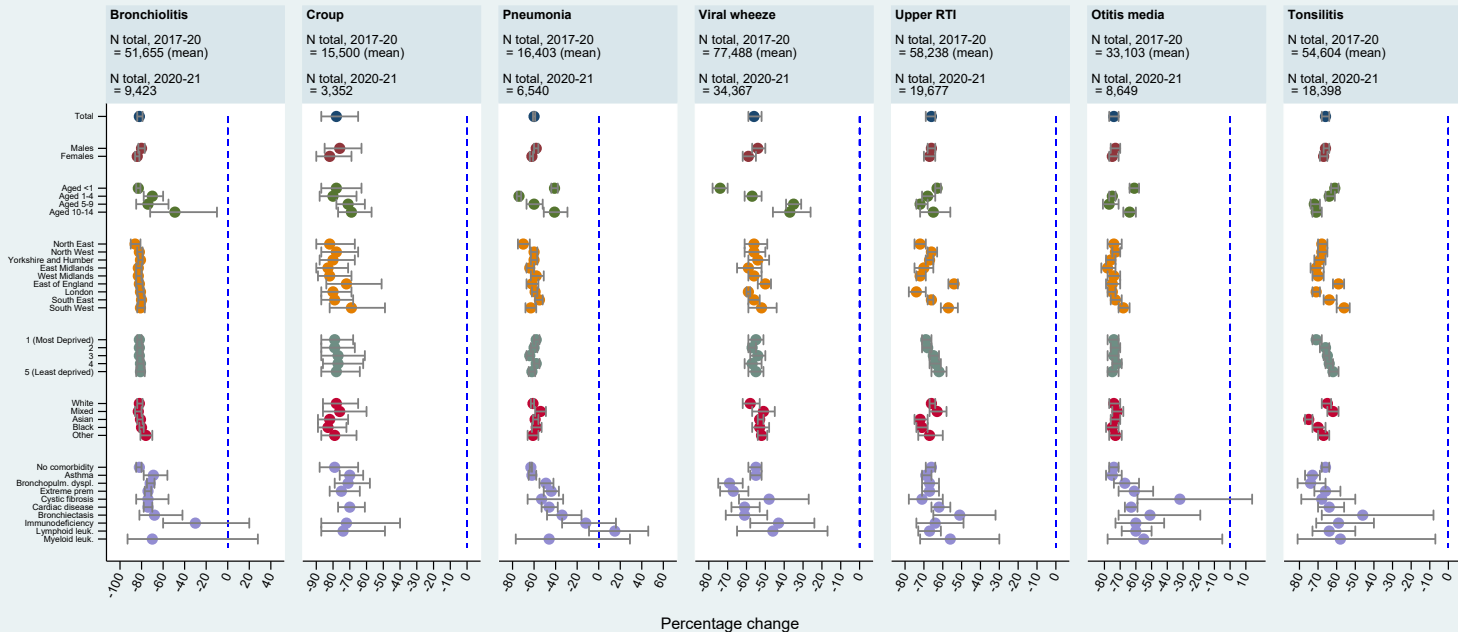

Counts <=5 suppressed

### Supplementary Figure 3: Invasive infections

Percentage change in the number of individuals admitted, from Mar 2017 - Feb 2020 (mean over 3 years) to Mar 2020 - Feb 2021

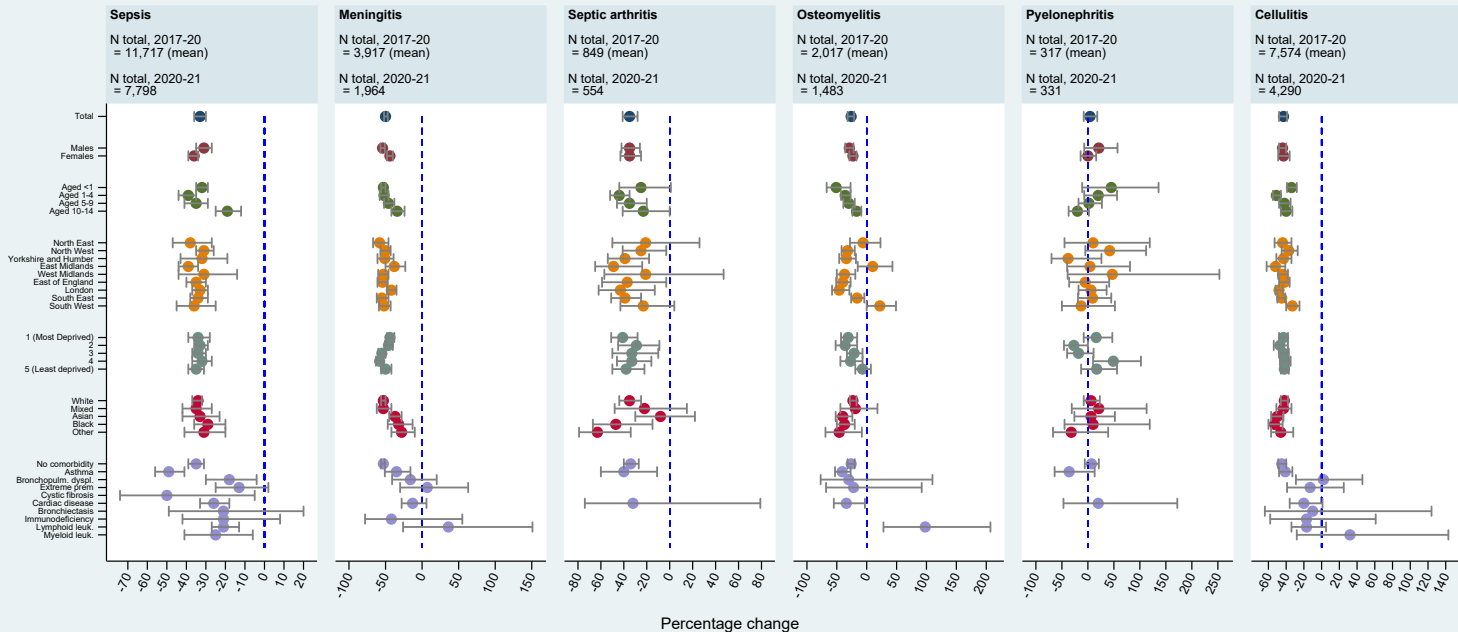

Counts <=5 suppressed

## Supplementary Figure 4: Vaccine preventable infections

Percentage change in the number of individuals admitted, from Mar 2017 - Feb 2020 (mean over 3 years) to Mar 2020 - Feb 2021

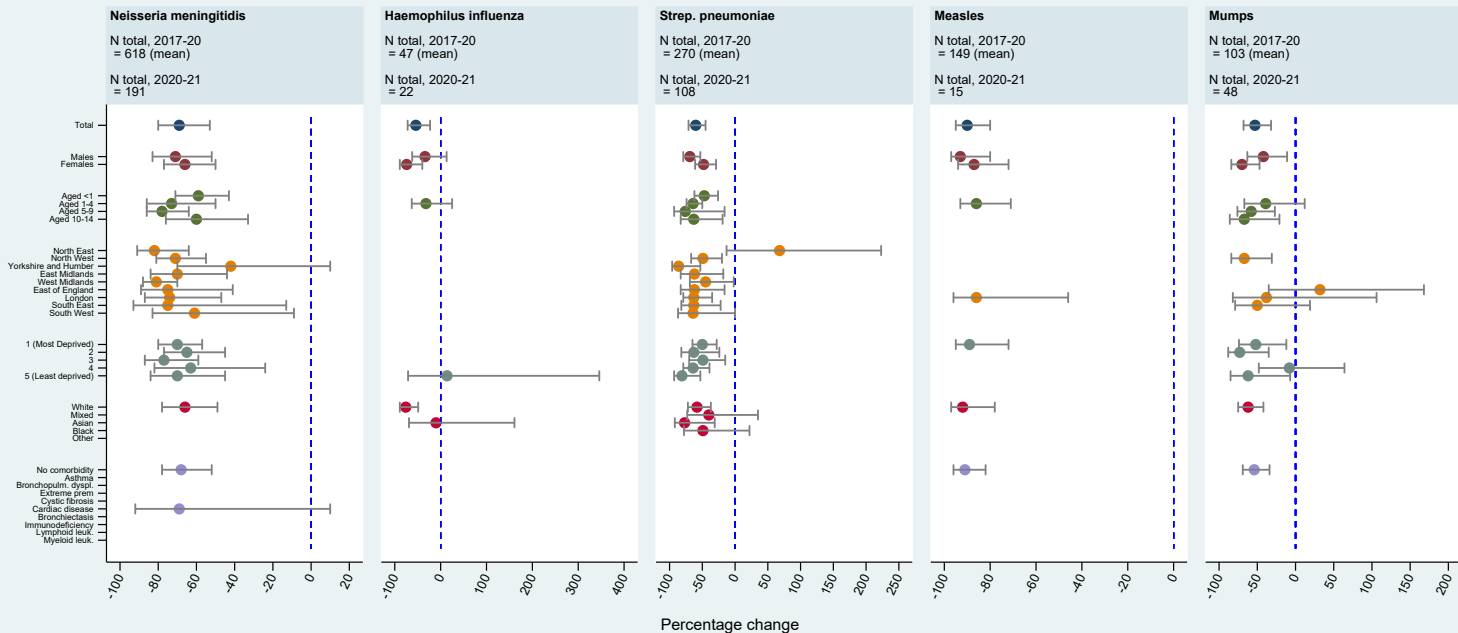

Counts <=5 suppressed
